# Supplementary material for: Phytoremediation Potential of Native Plant Species in Mine Soils Polluted by Metal(loid)s and Rare Earth Elements
Source: MDPI journal article supplement (doi:10.3390/plants12061219), 2023-03-07
Supplement: s1 [file s1]

**Table S1-** Linear correlation matrix of pH, EC, sand, silt, clay and metal(loid)s/REEs in all soil samples (n = 20).

|         | pH      | EC      | Sand   | Silt   | Clay    |         | pH      | EC      | Sand    | Silt   | Clay    |
|---------|---------|---------|--------|--------|---------|---------|---------|---------|---------|--------|---------|
| V-Tot   | 0.69**  | -0.55*  | 0.50*  | -0.03  | -0.43   | Bi-Tot  | 0.00    | 0.15    | 0.49*   | 0.48*  | -0.62** |
| V-Avai  | 0.47*   | 0.47*   | -0.09  | 0.60** | -0.15   | Bi-Avai | -0.07   | 0.04    | 0.30    | 0.59** | -0.49*  |
| V-Sol   | 0.60**  | 0.45*   | -0.21  | 0.33   | 0.06    | Bi-Sol  | nd      | nd      | nd      | nd     | nd      |
| Mn-Tot  | 0.00    | 0.24    | 0.31   | 0.67** | -0.53*  | Th-Tot  | -0.50*  | -0.54*  | 0.18    | -0.24  | -0.07   |
| Mn-Avai | -0.27   | 0.12    | 0.24   | 0.48*  | -0.39   | Th-Avai | -0.04   | 0.05    | -0.15   | 0.06   | 0.11    |
| Mn-Sol  | -0.52*  | -0.25   | 0.54*  | 0.15   | -0.53*  | Th-Sol  | -0.12   | 0.10    | 0.17    | 0.22   | -0.23   |
| Co-Tot  | 0.34    | 0.31    | 0.10   | 0.48*  | -0.27   | Ge-Tot  | -0.72** | -0.61** | 0.56**  | -0.12  | -0.45*  |
| Co-Avai | 0.09    | 0.22    | -0.22  | 0.41   | 0.44    | Ge-Avai | 0.41    | 0.32    | 0.04    | 0.13   | -0.008  |
| Co-Sol  | -0.49*  | 0.07    | 0.60** | 0.18   | -0.60** | Ge-Sol  | -0.03   | 0.18    | 0.58**  | 0.55*  | -0.72** |
| Ni-Tot  | -0.14   | 0.13    | 0.59** | 0.11   | -0.56** | Rb-Tot  | -0.08   | -0.10   | -0.31   | -0.18  | 0.34    |
| Ni-Avai | 0.004   | -0.04   | -0.09  | 0.21   | -0.002  | Rb-Avai | -0.09   | 0.36    | 0.40    | 0.57** | -0.57** |
| Ni-Sol  | -0.54*  | -0.16   | 0.47*  | 0.1    | -0.45*  | Rb-Sol  | -0.08   | 0.34    | 0.35    | 0.57** | -0.53*  |
| Cu-Tot  | 0.05    | 0.26    | 0.44*  | 0.62** | -0.63** | Cs-Tot  | 0.45*   | 0.30    | -0.58** | 0.02   | -0.50*  |
| Cu-Avai | -0.05   | 0.24    | 0.46*  | 0.67** | -0.66** | Cs-Avai | nd      | nd      | nd      | nd     | nd      |
| Cu-Sol  | -0.41   | 0.03    | 0.67** | 0.28   | -0.70** | Cs-Sol  | 0.2     | 0.32    | -0.15   | 0.34   | 0.006   |
| As-Tot  | 0.06    | 0.01    | 0.23   | 0.20   | -0.28   | U-Tot   | -0.73** | -0.30   | 0.53*   | -0.09  | -0.43   |
| As-Avai | 0.23    | 0.51*   | 0.07   | 0.68** | -0.32   | U-Avai  | -0.05   | 0.44    | 0.38    | 0.11   | -0.38   |
| As-Sol  | 0.38    | 0.41    | -0.006 | 0.49*  | -0.18   | U-Sol   | -0.18   | 0.28    | 0.24    | 0.15   | -0.27   |
| Sr-Tot  | 0.54*   | 0.56**  | -0.08  | 0.45*  | -0.09   | Pb-Tot  | -0.13   | 0.22    | 0.42    | 0.29   | -0.48*  |
| Sr-Avai | 0.39    | 0.32    | -0.39  | 0.12   | 0.30    | Pb-Avai | -0.29   | 0.01    | 0.42    | 0.19   | -0.45   |
| Sr-Sol  | 0.18    | 0.67**  | 0.17   | 0.42   | -0.32   | Pb-Sol  | -0.33   | 0.08    | 0.60**  | 0.53*  | -0.73** |
| Y-Tot   | -0.53*  | -0.49*  | 0.46*  | -0.02  | -0.39   | Zn-Tot  | -0.85** | -0.46*  | 0.53*   | -0.06  | -0.44*  |
| Y-Avai  | -0.78** | -0.41   | 0.40   | -0.15  | -0.29   | Zn-Avai | -0.29   | 0.08    | 0.36    | 0.52*  | -0.52*  |
| Y-Sol   | -0.51*  | -0.29   | 0.54*  | 0.24   | -0.57** | Zn-Sol  | -0.50*  | -0.21   | 0.52*   | 0.29   | -0.57** |
| Zr-Tot  | 0.57**  | 0.34    | -0.44* | 0.16   | 0.33    | Al-Tot  | -0.62** | -0.63** | 0.25    | -0.43  | -0.05   |
| Zr-Avai | 0.20    | -0.06   | -0.32  | -0.02  | 0.29    | Al-Avai | -0.36   | -0.38   | 0.43    | 0.10   | -0.42   |
| Zr-Sol  | -0.24   | -0.21   | 0.24   | 0.12   | -0.26   | Al-Sol  | 0.04    | -0.37   | 0.11    | 0.21   | -0.18   |
| Mo-Tot  | -0.45*  | -0.26   | 0.83** | -0.05  | -0.71** | Fe-Tot  | -0.80** | -0.41   | 0.68**  | -0.10  | -0.56*  |
| Mo-Avai | -0.016  | 0.24    | 0.30   | 0.69** | -0.53*  | Fe-Avai | -0.46*  | -0.05   | 0.29    | 0.28   | -0.36   |
| Mo-Sol  | 0.42    | 0.27    | -0.26  | 0.24   | 0.14    | Fe-Sol  | -0.21   | -0.2    | 0.50*   | 0.25   | -0.54*  |
| Cd-Tot  | -0.46*  | -0.14   | 0.54*  | -0.10  | -0.44   | Cr-Tot  | -0.13   | -0.13   | 0.48*   | -0.27  | -0.31   |
| Cd-Avai | -0.75** | -0.15   | 0.69** | 0.17   | -0.68** | Cr-Avai | 0.30    | 0.64**  | -0.36   | 0.17   | 0.25    |
| Cd-Sol  | -0.46*  | -0.05   | 0.63** | 0.35   | -0.69** | Cr-Sol  | -0.41   | -0.28   | 0.51*   | 0.02   | -0.46*  |
| In-Tot  | -0.36   | -0.06   | 0.56** | 0.04   | -0.51*  | Se-Tot  | -0.29   | -0.33   | 0.60**  | 0.01   | -0.54   |
| In-Avai | 0.09    | -0.12   | 0.12   | -0.21  | 0.02    | Se-Avai | -0.48*  | -0.10   | 0.32    | -0.01  | -0.28   |
| In-Sol  | -0.22   | -0.06   | 0.47*  | 0.04   | -0.44   | Se-Sol  | 0.41    | 0.25    | 0.28    | 0.36   | -0.39   |
| La-Tot  | -0.58** | -0.57** | 0.31   | -0.24  | -0.18   | Sn-Tot  | -0.62** | -0.39   | 0.63**  | 0.24   | -0.65** |
| La-Avai | -0.51*  | -0.01   | 0.42   | 0.35   | -0.50*  | Sn-Avai | nd      | nd      | nd      | nd     | nd      |
| La-Sol  | 0.04    | 0.19    | 0.28   | 0.48*  | -0.44   | Sn-Sol  | nd      | nd      | nd      | nd     | nd      |
| Ce-Tot  | -0.57** | -0.58** | 0.28   | -0.25  | -0.15   | Sb-Tot  | 0.05    | 0.09    | -0.13   | -0.17  | 0.18    |
| Ce-Avai | -0.19   | 0.13    | 0.15   | 0.39   | -0.28   | Sb-Avai | 0.26    | 0.60**  | -0.16   | 0.65** | -0.10   |
| Ce-Sol  | 0.001   | .15     | 0.31   | 0.49*  | -0.46*  | Sb-Sol  | 0.59**  | 0.71**  | -0.44   | 0.35   | 0.25    |
| Pr-Tot  | -0.61** | -0.58** | 0.29   | 0.26   | -0.16   |         |         |         |         |        |         |
| Pr-Avai | -0.49*  | -0.05   | 0.27   | 0.18   | -0.30   |         |         |         |         |        |         |
| Pr-Sol  | -0.14   | 0.07    | 0.36   | 0.46*  | -0.49*  |         |         |         |         |        |         |

Tot : total, Avai: available Sol: water soluble , \*\*Correlation is significant at the 0.01 level , \*Correlation is significant at the 0.05 level (2-tailed), nd: non detectable

**Table S2-** Linear correlation matrix of total metal(loid)s and REEs in all soil samples (n = 20).

|    | V                 | Mn                 | Co                 | Ni                | Cu                 | As                | Sr                 | Y                  | Zr                 | Mo                | Cd                 | In                | La                 | Ce                 | Pr                 | Bi     | Th                 | Ge      | Rb                | Cs                 | U                 | Pb                | Zn     | Al                | Fe                | Cr                | Se                | Sn |
|----|-------------------|--------------------|--------------------|-------------------|--------------------|-------------------|--------------------|--------------------|--------------------|-------------------|--------------------|-------------------|--------------------|--------------------|--------------------|--------|--------------------|---------|-------------------|--------------------|-------------------|-------------------|--------|-------------------|-------------------|-------------------|-------------------|----|
| V  |                   |                    |                    |                   |                    |                   |                    |                    |                    |                   |                    |                   |                    |                    |                    |        |                    |         |                   |                    |                   |                   |        |                   |                   |                   |                   |    |
| Mn | ns                |                    |                    |                   |                    |                   |                    |                    |                    |                   |                    |                   |                    |                    |                    |        |                    |         |                   |                    |                   |                   |        |                   |                   |                   |                   |    |
| Co | ns                | 0.78**             |                    |                   |                    |                   |                    |                    |                    |                   |                    |                   |                    |                    |                    |        |                    |         |                   |                    |                   |                   |        |                   |                   |                   |                   |    |
| Ni | ns                | ns                 | 0.52 <sup>+</sup>  |                   |                    |                   |                    |                    |                    |                   |                    |                   |                    |                    |                    |        |                    |         |                   |                    |                   |                   |        |                   |                   |                   |                   |    |
| Cu | ns                | 0.92**             | 0.86**             | 0.55 <sup>+</sup> |                    |                   |                    |                    |                    |                   |                    |                   |                    |                    |                    |        |                    |         |                   |                    |                   |                   |        |                   |                   |                   |                   |    |
| As | ns                | 0.51 <sup>+</sup>  | ns                 | ns                | ns                 |                   |                    |                    |                    |                   |                    |                   |                    |                    |                    |        |                    |         |                   |                    |                   |                   |        |                   |                   |                   |                   |    |
| Sr | -0.59**           | 0.55 <sup>+</sup>  | 0.81**             | ns                | 0.65**             | ns                |                    |                    |                    |                   |                    |                   |                    |                    |                    |        |                    |         |                   |                    |                   |                   |        |                   |                   |                   |                   |    |
| Y  | 0.54 <sup>+</sup> | ns                 | ns                 | ns                | ns                 | ns                | -0.51 <sup>+</sup> |                    |                    |                   |                    |                   |                    |                    |                    |        |                    |         |                   |                    |                   |                   |        |                   |                   |                   |                   |    |
| Zr | ns                | ns                 | 0.68**             | ns                | ns                 | ns                | 0.67**             | -0.51 <sup>+</sup> |                    |                   |                    |                   |                    |                    |                    |        |                    |         |                   |                    |                   |                   |        |                   |                   |                   |                   |    |
| Mo | ns                | ns                 | ns                 | 0.6**             | ns                 | ns                | ns                 | 0.59**             | -0.56**            |                   |                    |                   |                    |                    |                    |        |                    |         |                   |                    |                   |                   |        |                   |                   |                   |                   |    |
| Cd | ns                | ns                 | ns                 | ns                | ns                 | ns                | -0.51 <sup>+</sup> | 0.67**             | -0.65**            | 0.64**            |                    |                   |                    |                    |                    |        |                    |         |                   |                    |                   |                   |        |                   |                   |                   |                   |    |
| In | ns                | ns                 | ns                 | ns                | ns                 | ns                | ns                 | 0.49**             | ns                 | 0.55 <sup>+</sup> | 0.89**             |                   |                    |                    |                    |        |                    |         |                   |                    |                   |                   |        |                   |                   |                   |                   |    |
| La | 0.64**            | -0.46 <sup>+</sup> | -0.62**            | ns                | -0.49 <sup>+</sup> | ns                | -0.77**            | 0.73**             | -0.67**            | 0.47 <sup>+</sup> | 0.50 <sup>+</sup>  | ns                |                    |                    |                    |        |                    |         |                   |                    |                   |                   |        |                   |                   |                   |                   |    |
| Ce | 0.65**            | -0.45 <sup>+</sup> | -0.63**            | ns                | -0.50 <sup>+</sup> | ns                | -0.78**            | 0.72**             | -0.65**            | 0.44 <sup>+</sup> | 0.51 <sup>+</sup>  | ns                | 0.99**             |                    |                    |        |                    |         |                   |                    |                   |                   |        |                   |                   |                   |                   |    |
| Pr | 0.66**            | -0.46 <sup>+</sup> | -0.66**            | ns                | -0.51 <sup>+</sup> | ns                | -0.82**            | 0.71**             | -0.68**            | 0.44 <sup>+</sup> | 0.523 <sup>+</sup> | ns                | 0.99**             | 0.99**             |                    |        |                    |         |                   |                    |                   |                   |        |                   |                   |                   |                   |    |
| Bi | ns                | 0.84**             | 0.61**             | ns                | -0.86**            | 0.6**             | ns                 | ns                 | ns                 | ns                | ns                 | ns                | ns                 | ns                 | ns                 |        |                    |         |                   |                    |                   |                   |        |                   |                   |                   |                   |    |
| Th | 0.60**            | -0.48 <sup>+</sup> | -0.65**            | ns                | -0.55 <sup>+</sup> | ns                | -0.76**            | 0.64**             | -0.61**            | ns                | 0.44 <sup>+</sup>  | ns                | 0.98**             | 0.98**             | 0.98**             | ns     |                    |         |                   |                    |                   |                   |        |                   |                   |                   |                   |    |
| Ge | 0.73**            | ns                 | -0.51 <sup>+</sup> | ns                | -0.24              | ns                | -0.76**            | 0.75**             | -0.79**            | 0.69**            | 0.67**             | 0.49 <sup>+</sup> | 0.88**             | 0.88**             | 0.89**             | ns     | 0.81**             |         |                   |                    |                   |                   |        |                   |                   |                   |                   |    |
| Rb | 0.44 <sup>+</sup> | ns                 | ns                 | ns                | ns                 | ns                | ns                 | ns                 | 0.47 <sup>+</sup>  | ns                | ns                 | ns                | ns                 | ns                 | ns                 | ns     | ns                 | ns      |                   |                    |                   |                   |        |                   |                   |                   |                   |    |
| Cs | ns                | ns                 | ns                 | ns                | ns                 | ns                | ns                 | -0.56**            | 0.86**             | -0.67**           | -0.49 <sup>+</sup> | ns                | -0.55 <sup>+</sup> | -0.52 <sup>+</sup> | -0.53 <sup>+</sup> | ns     | -0.45 <sup>+</sup> | -0.66** | 0.74**            |                    |                   |                   |        |                   |                   |                   |                   |    |
| U  | 0.51 <sup>+</sup> | ns                 | -0.59**            | ns                | ns                 | ns                | -0.68**            | 0.75**             | -0.80**            | 0.52 <sup>+</sup> | 0.78**             | 0.65**            | 0.70**             | 0.69**             | 0.71**             | ns     | 0.629**            | 0.796** | ns                | -0.69**            |                   |                   |        |                   |                   |                   |                   |    |
| ns | ns                | 0.58 <sup>+</sup>  | ns                 | ns                | 0.56 <sup>+</sup>  | 0.52 <sup>+</sup> | 0.09               | ns                 | ns                 | ns                | 0.58**             | 0.83**            | ns                 | ns                 | ns                 | 0.63** | ns                 | ns      | ns                | ns                 | ns                |                   |        |                   |                   |                   |                   |    |
| Zn | 0.68**            | -0.16              | -0.53 <sup>+</sup> | ns                | ns                 | ns                | -0.76**            | 0.61**             | -0.82**            | 0.52 <sup>+</sup> | 0.67**             | 0.45 <sup>+</sup> | 0.72**             | 0.72**             | 0.76**             | ns     | 0.65**             | 0.89**  | ns                | -0.62**            | 0.82**            | ns                |        |                   |                   |                   |                   |    |
| Al | 0.70**            | -0.55 <sup>+</sup> | -0.72**            | ns                | -0.57**            | ns                | -0.87**            | 0.59**             | -0.62**            | ns                | 0.49 <sup>+</sup>  | 0.32              | 0.90**             | 0.91**             | 0.93**             | ns     | 0.89**             | 0.85**  | ns                | ns                 | 0.67**            | ns                | 0.74** |                   |                   |                   |                   |    |
| Fe | 0.74**            | ns                 | ns                 | ns                | ns                 | ns                | -0.70**            | 0.61**             | -0.70**            | 0.64**            | 0.70**             | 0.67**            | 0.61**             | 0.60**             | 0.64**             | ns     | 0.50 <sup>+</sup>  | 0.85**  | ns                | -0.54 <sup>+</sup> | 0.83**            | ns                | 0.90** | 0.69**            |                   |                   |                   |    |
| Cr | ns                | ns                 | ns                 | 0.53 <sup>+</sup> | ns                 | ns                | ns                 | 0.45**             | ns                 | 0.55 <sup>+</sup> | 0.67**             | 0.74**            | ns                 | ns                 | ns                 | ns     | ns                 | ns      | ns                | ns                 | ns                | 0.56 <sup>+</sup> | ns     | ns                | ns                |                   |                   |    |
| Se | ns                | ns                 | ns                 | 0.52 <sup>+</sup> | ns                 | ns                | ns                 | 0.73**             | -0.47 <sup>+</sup> | 0.78**            | 0.76**             | 0.70**            | 0.53 <sup>+</sup>  | 0.52 <sup>+</sup>  | 0.50 <sup>+</sup>  | ns     | 0.46 <sup>+</sup>  | 0.65**  | ns                | -0.53 <sup>+</sup> | 0.57**            | ns                | ns     | ns                | 0.49 <sup>+</sup> | 0.74 <sup>+</sup> |                   |    |
| Sn | 0.68**            | ns                 | ns                 | 0.45 <sup>+</sup> | ns                 | ns                | ns                 | 0.73**             | ns                 | 0.66**            | ns                 | ns                | 0.57**             | 0.55 <sup>+</sup>  | 0.55 <sup>+</sup>  | ns     | 0.46 <sup>+</sup>  | 0.67**  | ns                | ns                 | 0.50 <sup>+</sup> | ns                | 0.56** | 0.48 <sup>+</sup> | 0.62**            | ns                | 0.57 <sup>+</sup> |    |
| Sb | ns                | ns                 | ns                 | ns                | ns                 | ns                | ns                 | ns                 | ns                 | ns                | ns                 | ns                | ns                 | ns                 | ns                 | ns     | ns                 | ns      | 0.46 <sup>+</sup> | ns                 | ns                | ns                | ns     | ns                | ns                | ns                | ns                | ns |

\*\*Correlation is significant at the 0.01 level, \*Correlation is significant at the 0.05 level (2-tailed), Ns non significant
